# Supplementary material for: Isavuconazole Pharmacokinetics and Pharmacodynamics in Children
Source: MDPI journal article supplement (doi:10.3390/pharmaceutics15010075), 2022-12-26
Supplement: s1 [file s1]

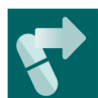**Table S1.** Model support points. Parameters are as defined in text and in Table 1.

| Ke0 (h <sup>-1</sup> )  | V0 (L) | Ka (h <sup>-1</sup> ) | KCP0 (h <sup>-1</sup> ) | KPC0 (h <sup>-1</sup> ) | Probability |
|-------------------------|--------|-----------------------|-------------------------|-------------------------|-------------|
| 1.5 x 10 <sup>-05</sup> | 47.50  | 12.00                 | 6.38                    | 0.50                    | 0.10        |
| 0.12                    | 50.13  | 12.00                 | 0.10                    | 0.03                    | 0.21        |
| 0.12                    | 40.88  | 12.00                 | 2.42                    | 0.23                    | 0.24        |
| 0.04                    | 73.32  | 0.01                  | 2.34                    | 5.00                    | 0.06        |
| 0.10                    | 37.27  | 0.04                  | 4.85                    | 2.49                    | 0.08        |
| 0.05                    | 57.71  | 0.02                  | 4.39                    | 0.78                    | 0.17        |
| 0.09                    | 24.60  | 1.08                  | 0.18                    | 1.34                    | 0.09        |
| 0.09                    | 24.58  | 1.08                  | 0.18                    | 1.34                    | 0.05        |

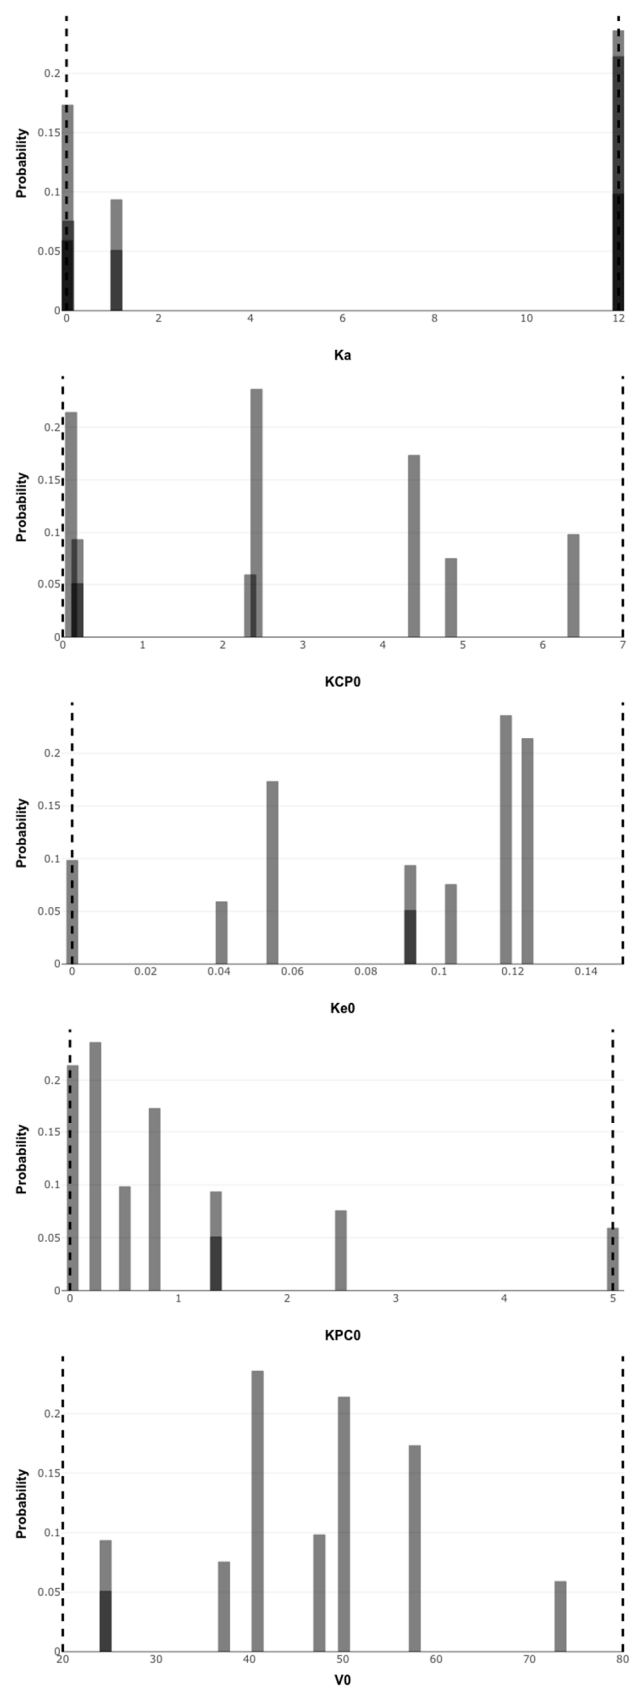

**Figure S1.** Marginal probability distributions for model parameter values. Vertical dashed lines are fixed boundaries. X axis is parameter value, Y axis is probability.

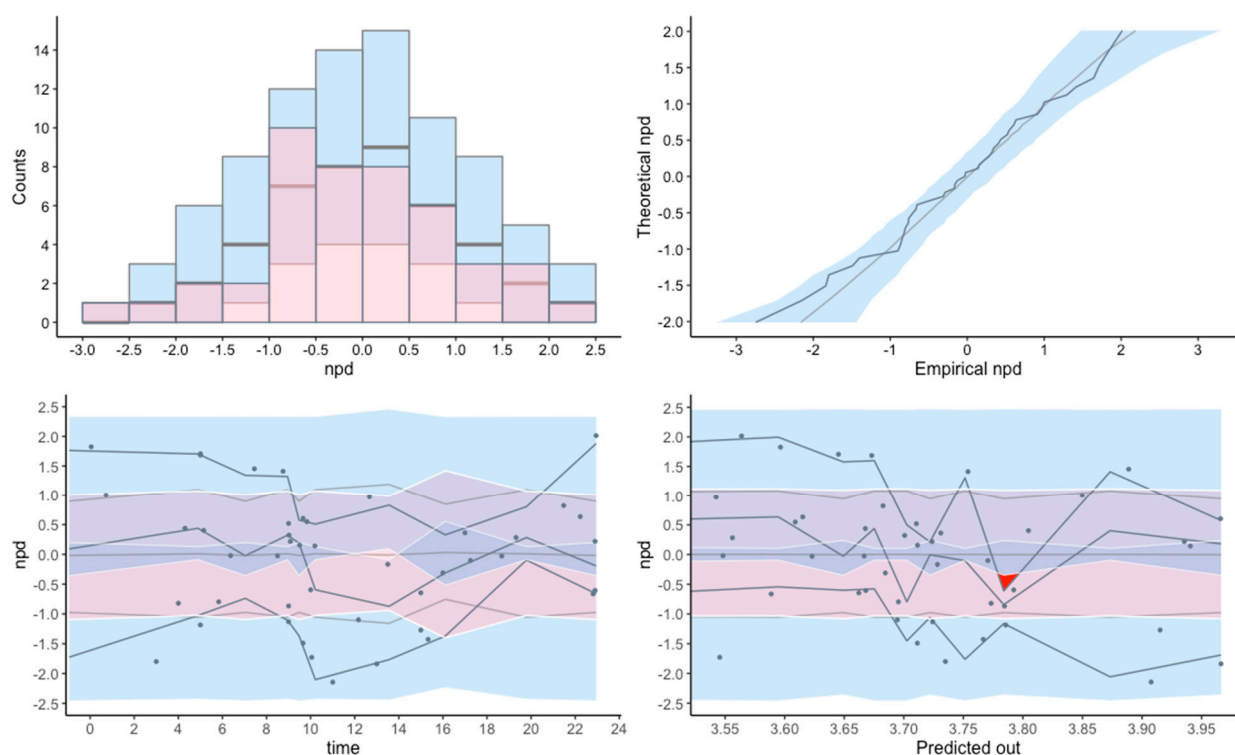

**Figure S2.** Normalized prediction distribution error (npde). Top left shows histogram of theoretical npd distribution according to normal distribution (blue) with mean and 95% CI, and model distribution (pink) within the expected distribution. Top right is Q-Q plot with theoretical (grey), compared to model derived line (dark grey), entirely within the 95% CI for expected distribution (blue). Bottom row shows time (left) and predicted (right) vs. npd. There is considerable overlap, but upper light grey line is the 95%ile of simulated concentrations. The upper darker line is the 95%ile of observations, lying within the upper blue region, which is the 95% CI surrounding the 95%ile of simulated concentrations. The pink 95% CI region surrounds the median of simulations, and the lower blue surrounds the 5%ile of simulations. Observation percentiles are within the expected distributions by simulation in both plots, except for the small red region in lower right plot.
